# Supplementary material
Source: PubMed Central journal article supplement (PMC5425307)
Supplement: NIHMS859105-supplement-Sup1.pdf [file NIHMS859105-supplement-Sup1.pdf]

**ESM Table 1. Primer Sequences**

| Target             | Primer sequence                                                     |
|--------------------|---------------------------------------------------------------------|
| miR-21             | Hs_miR-21_2 miScript Primer Assay, Qiagen cat# MS00009079           |
| RNU6-1             | MystiCq® microRNA qPCR Control Primer RNU6-1, Sigma cat# MIRCP00001 |
| <i>BCL2</i> FW     | TGGAGAGCGTCAACAGGGAGA                                               |
| <i>BCL2</i> RV     | CCCAGCCTCCGTTATCCTGG                                                |
| <i>Bcl-XL</i> FW   | GCAGTCAGCCAGAACCCTAT                                                |
| <i>Bcl-XL</i> RV   | GAGATGGGCTCAACCAGTCC                                                |
| <i>Mcl1</i> FW     | AACTGGGGCAGGATTGTGAC                                                |
| <i>Mcl1</i> RV     | CAGTCCCGCTTCGTCCTTAC                                                |
| <i>Dp5</i> FW      | GGACGTGGTCCCTTTCCTTT                                                |
| <i>Dp5</i> RV      | GCAAGCATCTCTCTCCCCTG                                                |
| <i>Bax</i> FW      | ACGGCAACTTCAACTGGGGC                                                |
| <i>Bax</i> RV      | TGATGGTTCTGATCAGCTCGGG                                              |
| <i>Bid</i> FW      | AGCCTCTCGGAGGAAGACAA                                                |
| <i>Bid</i> RV      | GGCCAACAGCATGGTCATTA                                                |
| <i>Puma</i> FW     | GAAGAGCAACATCGACACCG                                                |
| <i>Puma</i> RV     | GTAGGCACCTAGTTGGGCTC                                                |
| <i>Pdcd4</i> FW    | GGATCTGGAGGCGGGCAAC                                                 |
| <i>Pdcd4</i> RV    | AAGGCAGTGTTTCAGCTTCAGAT                                             |
| <i>Atf4</i> FW     | GCAGTGTTGCTGTAACGGACA                                               |
| <i>Atf4</i> RV     | CGCTGTTTCAGGAAGCTCATCT                                              |
| <i>Ddit3</i> FW    | CCACCACACCTGAAAGCAGAA                                               |
| <i>Ddit3</i> RV    | AGGTGAAAGGCAGGGACTCA                                                |
| <i>Hspa5</i> FW    | CCACCAGGATGCAGACATTG                                                |
| <i>HspA5</i> RV    | AGGGCCTCCACTTCCATAGA                                                |
| <i>Xbp1</i> FW     | AGCACTCAGACTACGTGCGCCTC                                             |
| <i>Xbp1</i> RV     | CCAGAATGCCCAAAGGATATCAG                                             |
| spl <i>Xbp1</i> FW | CTGAGTCCGCAGCAGGT                                                   |
| spl <i>Xbp1</i> RV | TGTCAGAGTCCATGGGAAGA                                                |

FW-forward, RV-reverse

**ESM Table 2.** Antibody Table

| Target                         | Dilution | Company              | Catalog Number |
|--------------------------------|----------|----------------------|----------------|
| Rabbit anti- BCL2              | 1:750    | Cell Signaling       | 2876           |
| Rabbit anti- PDCD4             | 1:750    | Cell Signaling       | 9535           |
| Rabbit anti- Cleaved caspase 3 | 1:750    | Cell Signaling       | 9664           |
| Mouse anti- Actin              | 1:10000  | MP Biomedicals       | 691002         |
| Donkey anti-mouse              | 1:10000  | LICOR<br>Biosciences | 926-32212      |
| Donkey anti-rabbit             | 1:10000  | LICOR<br>Biosciences | 926-32223      |

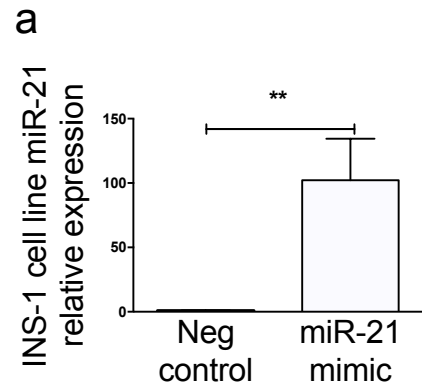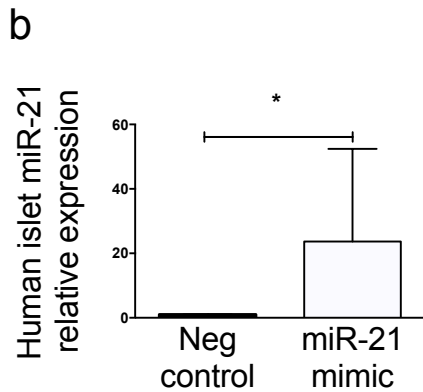

**ESM Fig. 1** miR-21 expression after miR-21 mimic transfection. Relative expression of miR-21 was quantified in **(a)** INS-1 cells and **(b)** human islets after 48 hour transfection with miR-21 mimics.  $n=4$  \* $p \leq 0.05$ ; \*\* $p \leq 0.01$

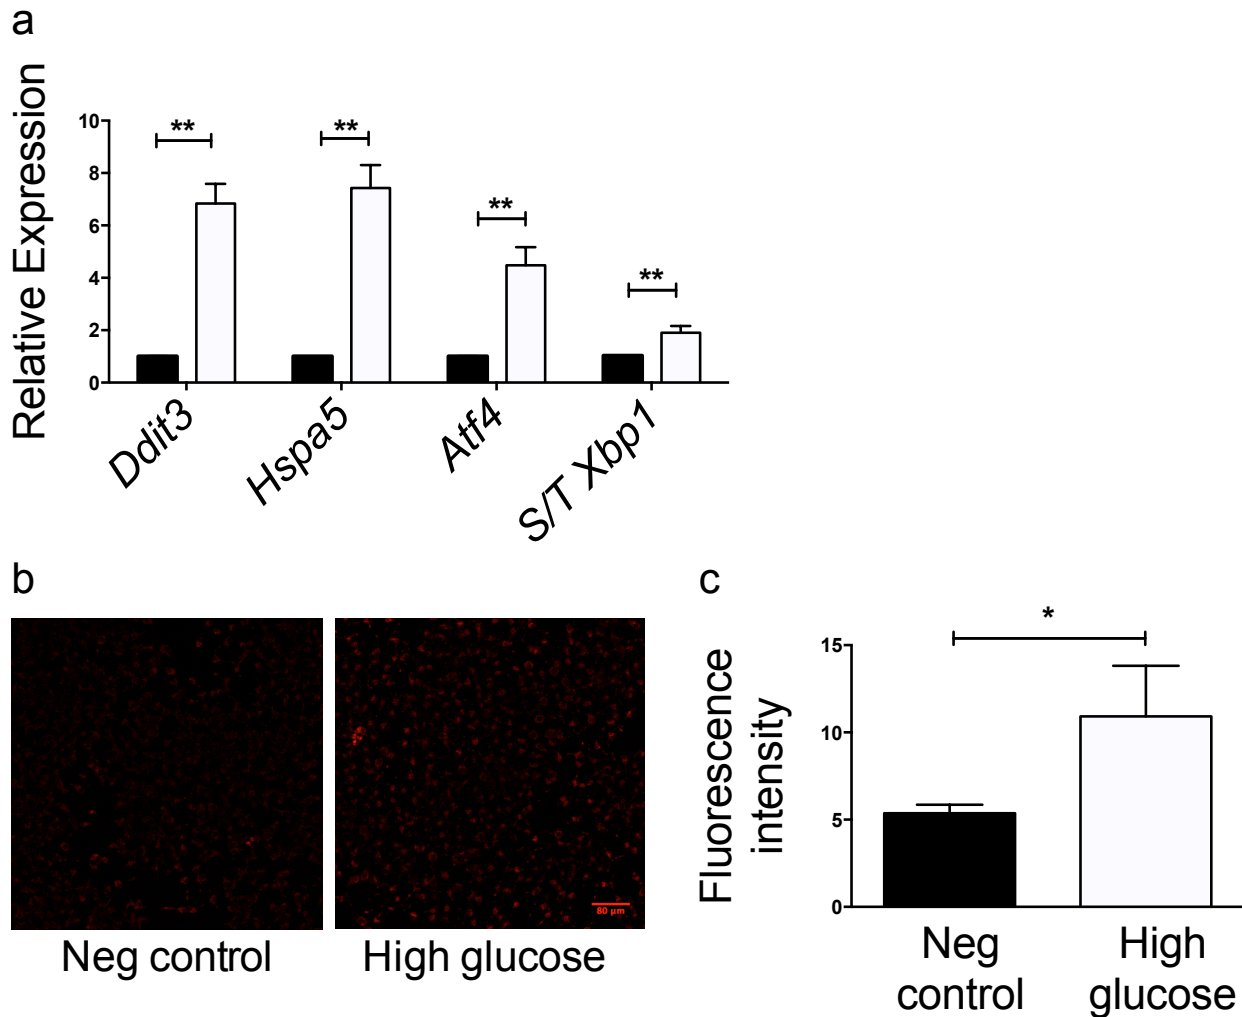

**ESM Fig. 2** Verification of treatment effects for tunicamycin and high glucose. **(a)** Effective treatment of INS-1 cells with tunicamycin (white bars) compared to controls (black bars) was verified via qPCR, revealing increased expression of ER stress genes.  $n=4$ . **(b)** Oxidative stress induction by high glucose treatment was verified using fluorescent detection of ROS generation. Representative images are shown. **(c)** Fluorescence quantification.  $n=3$ .  $*p \leq 0.05$ ;  $**p \leq 0.01$
